# Supplementary material for: Cognitive, behavioral and socio-communication skills as predictors of response to Early Start Denver Model: a prospective study in 32 young children with Autism Spectrum Disorder
Source: Front Psychiatry. 2024 May 30;15:1358419. doi: 10.3389/fpsyt.2024.1358419 (PMC11170145; doi:10.3389/fpsyt.2024.1358419)
Supplement: Supplementary file 2 [file Table_2.xlsx]

## Sheet: Suppl. Table S4
			GRIFFITH_B_PERSOL_SOCIAL	VINE_COMM	ADI_R_C_sum	PEP3_COGNITIVE_VP	PEP3_EXPRESSIVE_LANG	PEP3_RECEPTIVE_LANG	PEP3_VISUAL_MOTOR_IMI	ADOS2_SOCIAL_AFFECT
	GRIFFITH_B_PERSOL_SOCIAL	r di Pearson	—
		p	—
	VINE_COMM	r di Pearson	0.512*	—
		p	0.011	—
	ADI_R_C_sum	r di Pearson	-0.258	-0.255	—
		p	0.214	0.229	—
	PEP3_COGNITIVE_VP	r di Pearson	0.709***	0.709***	-0.414*	—
		p	< .001	< .001	0.044	—
	PEP3_EXPRESSIVE_LANG	r di Pearson	0.413*	0.55**	0.006	0.538**	—
		p	0.04	0.007	0.977	0.006	—
	PEP3_RECEPTIVE_LANG	r di Pearson	0.572**	0.6**	-0.135	0.729***	0.8***	—
		p	0.003	0.002	0.529	< .001	< .001	—
	PEP3_VISUAL_MOTOR_IMI	r di Pearson	0.532**	0.504*	-0.218	0.555**	0.607**	0.631***	—
		p	0.006	0.014	0.307	0.004	0.001	< .001	—
	ADOS2_SOCIAL_AFFECT	r di Pearson	-0.562**	-0.329	0.363	-0.376	-0.221	-0.4	-0.201	—
		p	0.004	0.116	0.082	0.077	0.31	0.059	0.357	—
	* p < .05, ** p < .01, *** p < .001
